# 1 Detection of Lumpy Skin Disease Virus Reads in the Human Upper 2 Respiratory Tract Microbiome Requires Further Investigation

3  
4 **Authors:** Siddharth Singh Tomar<sup>1,2</sup> & Krishna Khairnar<sup>1,2\*</sup>

5 **Author Affiliation:** <sup>1</sup>Environmental Epidemiology and Pandemic Management (EE&PM),  
6 Council of Scientific and Industrial Research-National Environmental Engineering Research  
7 Institute (CSIR-NEERI), Nagpur, India.

8 &

9 <sup>2</sup>Academy of Scientific and Innovative Research (AcSIR), Ghaziabad, UP, India.

10 \*Corresponding author: Correspondence to Krishna Khairnar e-mail: [k\\_khairnar@neeri.res.in](mailto:k_khairnar@neeri.res.in),  
11 [kskhairnar@gmail.com](mailto:kskhairnar@gmail.com)

## 12 Abstract

13 Lumpy skin disease virus (LSDV), a double-stranded DNA virus from the Capripoxvirus genus,  
14 primarily affects *Bos indicus*, *Bos taurus* breeds, and water buffalo. Arthropod vectors, including  
15 mosquitoes and biting flies, are the main LSDV transmitters. Although LSDV is not zoonotic, this  
16 study unexpectedly detected LSDV reads in the upper respiratory tract microbiome of humans  
17 from rural and urban areas in Maharashtra, India. Nasopharyngeal and oropharyngeal swab  
18 samples collected for SARS-CoV-2 surveillance underwent whole-genome metagenomics  
19 sequencing, revealing LSDV reads in 25% of samples. SKA analysis provided insights into  
20 sample relatedness despite the low coverage of LSDV reads with the reference genome. Our  
21 findings, which include the detection of LSDV contigs aligning to specific locations on the  
22 reference genome, suggest a common source for LSDV reads, potentially shared water sources  
23 or milk/milk products. Further investigation is needed to ascertain whether these reads indicate  
24 actual LSDV infections, environmental uptake, or cross-reactivity with related viral sequences.

25  
26 **Keywords:** *Lumpy skin disease virus (LSDV), Metagenomics, Upper respiratory tract,*  
27 *Zoonoses, Human-animal interface*

28  
29  
30  
31  
32

## 33 1. Introduction

34 Lumpy skin disease virus (LSDV) is a double-stranded DNA virus belonging to the  
35 Capripoxvirus genus of the *Poxviridae* family. Within this genus are two other virus  
36 species: sheeppox and goatpox. LSDV exhibits a strong host specificity and causes  
37 disease mainly in *Bos indicus* and *Bos taurus* breeds and water buffalo (*Bubalus*  
38 *bubalis*).

39  
40 Arthropod vectors primarily transmit LSDV. Studies have demonstrated that *Aedes*  
41 *aegypti* mosquitoes<sup>1</sup>, *Stomoxys calcitrans*<sup>2</sup>, and *Haematopota spp.* biting flies can  
42 mechanically transmit LSDV<sup>3</sup>. Additionally, other mosquitoes such as *Culex mirificens*  
43 and *Aedes natrionus*<sup>4</sup>, flies like *Biomyia fasciata*, *Culicoides*, and ticks such as  
44 *Rhipicephalus appendiculatus* and *Amblyomma hebraeum*, are likely to contribute to  
45 virus transmission in natural settings<sup>5</sup>. Contact with infected animals is considered to  
46 have a minor role in virus transmission<sup>6</sup>. Some studies suggest non-vector transmission  
47 such as ingesting contaminated feed and water with infected saliva<sup>7,8</sup>.

48  
49 LSDV is not a zoonotic virus as there is no evidence to suggest that it can infect humans  
50 or cause disease in them. However, in this study, we observed the presence of LSDV  
51 reads in the upper respiratory tract (URT) microbiome of humans. The Nasopharyngeal  
52 (NP) and Oropharyngeal (OP) samples belong to different locations in the central Indian  
53 region of Vidarbha (Maharashtra). These samples were collected as part of the Central  
54 government's SARS-CoV-2 genome surveillance program. These samples were  
55 subjected to non-targeted metagenomics to understand the microbial diversity of the  
56 samples. The collection period of samples coincides with the period of LSDV circulation  
57 in the region. While analyzing the data, the LSDV reads appeared in the samples.

58  
59 This observation suggests the possibility of non-vector-borne transmission of LSDV.  
60 Despite LSDV not infecting humans, extensive bovine-human contact in India through  
61 activities such as agriculture, dairy production, and religious rituals raises concerns  
62 about the transmission of other diseases from cattle to humans. While LSDV itself isn't  
63 zoonotic, other diseases carried by cattle could pose risks to humans. There could also  
64 be a possibility of humans passively transmitting LSDV to cattle.

65  
66

## 67 **2. Materials and Methods**

### 68 **2.1. Sample Collection**

69 NP-OP swab samples were collected in Viral Transport Medium (VTM) by trained  
70 paramedical staff at various primary healthcare centres and SARS-CoV-2 molecular  
71 testing laboratories from 5 districts of Vidarbha region during March-April 2023. The  
72 samples were then tested for SARS-CoV-2 using qRT-PCR. Positive samples  $\leq$  25 cycle  
73 threshold value were selected and transported for SARS-CoV-2 whole genome  
74 sequencing (WGS), aliquots of these positive samples were preserved at  $-80^{\circ}\text{C}$ . 48 (n)  
75 aliquots of these positive samples were selected for whole-genome metagenomics  
76 (WGMG) sequencing. The median (interquartile range [IQR]) age was 36 (65 to 16)  
77 years, and 24 (50%) of the samples were from females. Location data of every sample  
78 was collected and classified as urban and rural households, and the urban-rural  
79 distribution of samples stands at 20 (41.6%) and 28 (58.3%) respectively  
80 **(Supplementary data)**.

81

### 82 **2.2. DNA extraction, Library preparation, & Metagenomic Sequencing**

83 DNA extraction was performed with QIAamp DNA Microbiome Kit (51704) per the kit's  
84 protocol. Post-DNA extraction, the Preliminary quality control was done using Qubit to  
85 determine the concentration (ng/ul) and Nanodrop (A260/280, A260/230) to determine  
86 the purity of extracted metagenomic DNA. Library preparation was done with QIAseq FX  
87 DNA Library preparation kit<sup>9</sup> per the kit's protocol. The sequencing platform utilised was  
88 NextSeq550, employing a 2x150 chemistry high-output 300-cycle kit.

89

### 90 **2.3. Data Analysis**

91 Fastq files generated after sequencing were analyzed using the Chan Zuckerberg ID  
92 (v8.3)<sup>10</sup>, a cloud-based bioinformatic data analysis software. The following steps were  
93 involved in the data analysis using Chan Zuckerberg ID (CZid)

94

#### 95 **2.3.1 Sequencing Data QC**

96 External RNA Controls Consortium (ERCC) sequences were removed using Bowtie2<sup>11</sup>.  
97 Sequencing adapters, short reads, sequences with low quality, and low complexity

98 regions were filtered out using a customized version of fastp. Specifically, bases with  
99 quality scores below 17, reads shorter than 35 bp, sequences containing low complexity  
100 regions exceeding 40%, and sequences with more than 15 undetermined bases (Ns)  
101 were excluded.

102

### 103 **2.3.2. Host Filtering**

104 Human sequences were removed through Bowtie2<sup>11</sup> and HISAT2 alignments against  
105 reference human genomes. Only one representative read is retained for sequences that  
106 are 100% identical based on the first 70 bp, using CZID-dedup. Host reads were filtered  
107 out using the Spliced Transcripts Alignment to A Reference (STAR) algorithm. Duplicate,  
108 low-quality, and low-complexity sequences were removed in this process. The non-  
109 human reads were then aligned to the NCBI nucleotide and protein database (NCBI  
110 Index Date: 2021-01-22) using GSNAPL and RAPSearch, respectively.

111

### 112 **2.3.3. Alignment**

113 Host-filtered reads were aligned to the NCBI nucleotide (NT) database using Minimap2<sup>12</sup>  
114 and the NCBI protein (NR) database using the Diamond tool<sup>13</sup>. The hits from Minimap2  
115 and Diamond were assigned their corresponding accession numbers. Combined taxon  
116 counts were generated by using Gsnap and Rapsearch.

117

### 118 **2.3.4. Assembly**

119 To improve sensitivity in mapping, short reads are de novo assembled using SPADES<sup>14</sup>  
120 to generate longer contigs. However, SPADES output lacks information on individual  
121 contigs associated with each read. To address this, bowtie2 maps original reads back to  
122 assembled contigs, restoring the link between reads and contigs. This process utilizes a  
123 Bowtie2 database constructed from contigs. BLAST analysis is then conducted  
124 separately for contigs, initially against the NT-BLAST database generated from short-  
125 read alignments to NCBI NT using GSNAP, followed by NR-BLAST against NCBI NR  
126 using Rapsearch2.

127

## 128 **2.4. Threshold for Viral Reads Detection**

129 Detection of virus reads is challenging in whole genome metagenome data due to their  
130 low abundance, lower genome size, and high genomic diversity. Therefore, selecting the  
131 threshold criteria is crucial for reliable detection. Grundy et al. (2023)<sup>15</sup> experimentally

132 established that 2.4 reads per million (rPM) is the optimum threshold for viral pathogen  
133 detection in a metagenomics dataset. We, however used the more conservative filters  
134 NT rPM  $\geq 10$  and NT L (alignment length)  $\geq 35$ . We utilized the NT and NR sequence  
135 filters to mitigate the risk of false identifications in the NCBI database due to  
136 misalignment or misannotation.

137

### 138 **3. Results**

#### 139 **3.1. Sequencing Data Quality Control (QC)**

140 The data set consists of 48 NP-OP samples. On average (mean  $\pm$  SD), these samples  
141 had 7,258,602 (7.26 million)  $\pm$  1,540,000 reads, of which 1,777,507 (1.77 million)  $\pm$   
142 5,684,09 reads (25.63 %  $\pm$  10.17 %) were identified as nonhuman reads (passed filters).  
143 **(Figure 1)** The average minimum and maximum insert sizes were 35 and 557,  
144 respectively. The Average Duplicate Compression Ratio (DCR) of data was 1.01 (for  
145 metagenomics without enrichment, a DCR value less than 2 is ideal)<sup>16</sup>. Overall, 81% of  
146 reads passed the QC following filtering with fastp to eliminate low-quality bases, short  
147 reads (less than 35 base pairs in length), and reads with low complexity. **(Figure 2)**

148

#### 149 **3.2. Detection of Viral Reads in the Dataset**

150 After applying specific thresholds for the detection of viral reads in the metagenomic  
151 data, including Nucleotide reads per million (NT rPM)  $\geq 10$ , Nucleotide alignment length  
152 in base pairs (NT L)  $\geq 35$ , and Nucleotide (NT) and Protein (NR) Z Scores  $\geq 1$  against  
153 a background model of (water only), the analysis revealed the presence of Lumpy Skin  
154 Disease Virus (LSDV) reads in 12 out of 48 (25%) samples **(Figure 3)**. (sample 23G214-  
155 5G-294\_S21 was not considered as it had no aligned contigs with the LSDV reference  
156 genome KX683219.1) However, it showed 76% coverage and 2.2x depth when aligned  
157 to LSDV strain EGPT75 EEV126 gene, partial cds (MH639086.1).

158 The average alignment length of the reads is  $746 \pm 231$  bases. However, these samples  
159 showed a low coverage and sequencing depth for LSDV reads. Samples had  $0.6 \pm 1.12$   
160 average (Coverage Depth X) and  $0.87 \pm 0.4$  (Coverage Breadth %) **(Table 1)**

161

#### 162 **3.3. Consensus Genome**

163 A consensus genome derived from samples containing LSDV (Lumpy Skin Disease  
164 Virus) reads would represent a composite sequence assembled from the overlapping  
165 sequences obtained from the dataset. The sample with the highest rPM value (1440)

166 was selected to construct the consensus genome. Czid's consensus genome feature for  
167 viral reads was used to create the consensus genome of LSDV<sup>17</sup>. The consensus  
168 genome was built against the LSDV reference sequence (AF409137.1). The consensus  
169 genome showed 27.7% GC content, with 2271 informative nucleotides covering 1.5% of  
170 the LSDV genome (**Figure 4**).

### 171 172 **3.4. General Relationships among the Samples**

173 As the selected samples have contigs covering a small portion of the reference  
174 sequence of LSDV (<25%) therefore, the data is not sufficient for constructing a  
175 phylogenetic tree<sup>18</sup>; instead, we used Czid's web-based pipeline to create a pairwise  
176 distance matrix for understanding the relationships between identified taxa (LSDV) in the  
177 samples. The distance matrix depicts Mash-like distances between samples, calculated  
178 using the Jaccard Index (j) based on split kmer matches<sup>19</sup>. Mash-like distances are  
179 shown in a pairwise matrix, where each sample is compared to itself and others. Colors  
180 represent distance ranges, with dark red squares along the diagonal indicating identical  
181 sequences (**Figure 5**).

### 182 183 **3.5. Genomic Position and Classification of (LSDV) Contigs**

184 Czid's coverage visualisation tool was used to determine the location of contigs over the  
185 reference genome. The corresponding accession numbers of reference genomes were  
186 also annotated. These samples were classified as wild-type (WT) and vaccine strain (V)  
187 based on the classifications as reported by Flannery et al. (2021)<sup>20</sup>. The table also  
188 includes information on each sample's total number of contigs and specifies its genomic  
189 position over the reference genome. It was observed that the contigs aligned to some  
190 specific regions of the reference genomes; these regions are 55109 to 57997 bp,  
191 115916 to 117098 bp, 116144 to 117104 bp, and 124934 to 127961 bp. (**Table 2**) This  
192 observation is indicative of a probable common source of the LSDV reads.

### 193 194 **3.6. CZid pipeline compared with Centrifuge**

195 CZid uses the Genomic Short-read Nucleotide Alignment Program GSNAP<sup>21</sup> to align the  
196 reads with the reference genome using the NCBI index. Centrifuge<sup>22</sup> employs an  
197 indexing strategy derived from the Burrows-Wheeler transform (BWT) and the Ferragina-  
198 Manzini (FM) index for efficient metagenomic classification. We compared the results  
199 from CZid (rPM) and Centrifuge (Unique Reads) to avoid any pipeline-dependent biases;

200 both results followed a similar trend, as shown in **(Figure 6)** detailed results are shown  
201 in **(Table 3)**

202  
203

#### 204 **4. Discussion**

205 In this study, we have reported the detection of LSDV reads in the human upper  
206 respiratory tract microbiome. 48 NP-OP swab samples from 5 districts of Maharashtra  
207 were randomly selected for this study; these samples were collected from different  
208 healthcare centers and testing labs for SARS-CoV-2 genome surveillance. These  
209 samples were then subjected to enrichment-free whole-genome metagenomics (WGMG)  
210 sequencing to investigate upper respiratory tract microbiome composition.

211  
212 The generated data set consists of 7.25 million reads on average, with an average of  
213 25% of reads passing the host filters. The detection of LSDV reads was consistently  
214 observed among the samples; 20 out of 48 samples were detected with LSDV reads  
215 before applying the selection threshold criteria of NT rPM  $\geq 10$  and NT L (alignment  
216 length)  $\geq 35$ . After using this criterion, the number of samples with LSDV reads  
217 detection decreases to 12 (25%) of the total samples.

218  
219 It was observed that the LSDV viral contigs showed less coverage with the reference  
220 genome. The low coverage of LSDV viral contigs with the reference genome could be  
221 attributed to several factors, including generally low biomass NP-OP sampling.<sup>23</sup> The  
222 samples involved in this study were OP-NP swab samples collected in VTM by primary  
223 healthcare workers from urban and rural regions of Vidarbha (Central India). Maintaining  
224 Cold chain transport is challenging for samples from rural areas; a break in the cold  
225 chain may contribute to sample degradation, compromising the coverage during  
226 sequencing.

227  
228 Also, factors like the physical conditions of NP-OP, depth of sampling, the presence of  
229 mucous, and the age of the participants may determine the availability of biomass/tissue  
230 material while sampling. Metagenomics data generation, especially with low biomass  
231 NP-OP swab samples, presents challenges due to limited microbial material, complex  
232 microbial communities, and host DNA contamination.<sup>24,25,26</sup>

233



234 Another reason for the observed low coverage of LSDV reads could be genetic  
235 variability within the viral population that can lead to mismatches between the reference  
236 genome and sequenced reads, reducing alignment efficiency and coverage of viral  
237 contigs.<sup>27,28</sup>

238  
239 As the contigs covered only a limited portion of the reference sequence of LSDV in the  
240 selected samples, this prevented the construction of a phylogenetic tree. Therefore, we  
241 used Czid's web-based pipeline, which allowed us to create a pairwise distance matrix.  
242 This pipeline used the split kmer analysis (SKA) method to determine the degree of  
243 relatedness among the samples. SKA enables quick comparison and alignment of  
244 shorter genome fragments, which makes it well-suited for surveillance and outbreak  
245 analyses. It can create split kmer files from fasta or fastq formats, cluster them, align  
246 them with a reference sequence, and offer various comparative and summary metrics.  
247 SKA has demonstrated accuracy with Illumina sequencing data.<sup>29</sup> Furthermore, a  
248 comparison between CZid and Centrifuge pipelines demonstrated similar trends in  
249 results, indicating consistency across different analysis methods.

250  
251 The detection of LSDV reads in the human upper respiratory tract microbiome poses  
252 intriguing questions and warrants further investigation. While LSDV is traditionally  
253 associated with bovines and causes significant economic losses in the agricultural  
254 sector, its presence in the human respiratory tract microbiome indicates a potential  
255 uptake by humans from the environment. LSDV is primarily transmitted through  
256 arthropod vectors and direct contact with infected animals, thus making its presence in  
257 the human upper respiratory tract unexpected. Out of 12 samples with LSDV reads,  
258 seven belong to rural areas, and five belong to Urban areas. LSDV reads in the URT  
259 microbiome could also be attributed to frequent contact between humans and livestock  
260 in India.<sup>30</sup>

261  
262 Another plausible explanation for LSDV reads detection in URT could be traced to  
263 consuming milk from infected bovines. Bedkovic (2018)<sup>31</sup> reported the detection of  
264 LSDV viral particles in Milk. These viral particles in milk could either be from naturally  
265 infected or animals vaccinated with Live, Attenuated Vaccines, as in the case of LSDV.  
266 DNA from LSDV wildtype and vaccine strains were also detected in the milk and body  
267 fluids of vaccinated animals.<sup>31,32</sup> Our data also showed the detection of contigs from both



268 wild-type and Vaccine strains of LSDV. These contigs were observed to be consistently  
269 aligning to specific locations on the reference genome, this observation is suggestive of  
270 a common source for LSDV reads. This common source is more likely to be a water  
271 source shared by both humans and animals or milk/milk-products from LSDV infected or  
272 Vaccinated bovines.

273  
274 Therefore, it is crucial to investigate whether these reads represent actual LSDV  
275 infections in humans, take-up from the environment, or cross-reactivity with related viral  
276 sequences. Accurate taxonomic classification and identification of viral sequences  
277 require comprehensive reference databases and stringent alignment criteria to minimize  
278 false-positive results and ensure the reliability of findings.<sup>33</sup> Therefore, investigations in  
279 this direction further validate the presence of LSDV reads using alternative experimental  
280 approaches and studies in controlled environments.

281

### 282 **Acknowledgement**

283 The authors are thankful to CSIR-NEERI for providing funds under project OLP-57  
284 (March 2023 - April 2024 ) for conducting this study

285

### 286 **Data availability statement**

287 The data for the samples in this study is available as “**Viral\_Metagenome\_Covid**” on  
288 CZid.

289

### 290 **Author declaration**

291 The author assures that the research has followed all ethical guidelines and received  
292 approvals from the Institutional Ethics Committee for Research on Human Subjects  
293 (IEC) of CSIR-NEERI, Nagpur-20, India. Necessary consent from patients/participants  
294 has been obtained and relevant institutional documentation is archived.

295

### 296 **Confidentiality declaration**

297 Sample IDs (**23G214-5G-264\_S1 to 23G214-5G-311\_S48**) are masked IDs and cannot  
298 be traced to participant details. Precise age of the participants is masked and non-  
299 overlapping age ranges were used.

300

301

302  
303  
304  
305  
306  
307  
308  
309  
310  
311  
312  
313  
314  
315  
316  
317  
318  
319  
320  
321  
322  
323  
324  
325  
326  
327  
328  
329

## Figures

**Figure 1:** Distribution of total reads and nonhuman reads in the dataset. Each sample, on average, contained approximately 7,258,602 reads, with 25.6% identified as nonhuman reads after passing filters.

**Figure 2:** Quality control (QC) results showing the percentage of reads passing filtering with fastp, eliminating low-quality bases, short reads (<35 base pairs), and reads with low complexity. Overall, 81% of reads passed the QC process.

**Figure 3:** Detection of Lumpy Skin Disease Virus (LSDV) reads in metagenomic samples after applying specific thresholds for viral read detection.

**Figure 4:** Consensus genome analysis against the LSDV reference sequence (AF409137.1) showing 27.7% GC content and 2271 informative nucleotides, covering 1.5% of the LSDV genome.

**Figure 5:** Pairwise Mash-like distance matrix illustrating Jaccard Index (j) based on split kmer matches between samples. Dark red squares along the diagonal indicate identical sequences, with colors representing distance ranges.

**Figure 6:** Comparison of CZid (rPM) and Centrifuge (Unique Reads) pipeline results, demonstrating a consistent trend across both methods.

330

## Tables

331

| Sample            | NCBI Reference | Reference Length  | Aligned Contigs | Aligned Loose Reads | Coverage Depth X | Coverage Breadth % | Max Alignment Length | Avg. Mismatched % | % Matched    |
|-------------------|----------------|-------------------|-----------------|---------------------|------------------|--------------------|----------------------|-------------------|--------------|
| 23G214-5G-280_S17 | AF409137.1     | 150,793.00        | 1.00            | 0.00                | 0.03             | 0.40               | 617.00               | 0.20              | 99.80        |
| 23G214-5G-281_S18 | AF325528.1     | 150,773.00        | 2.00            | 3.00                | 0.07             | 1.00               | 961.00               | 0.60              | 99.40        |
| 23G214-5G-282_S19 | KY702007.1     | 150,661.00        | 2.00            | 1.00                | 0.23             | 1.00               | 722.00               | 0.40              | 99.60        |
| 23G214-5G-285_S22 | MT130502.2     | 146,159.00        | 2.00            | 1.00                | 0.07             | 1.00               | 722.00               | 0.00              | 100.00       |
| 23G214-5G-286_S23 | MN072619.1     | 150,663.00        | 1.00            | 3.00                | 0.06             | 0.80               | 961.00               | 0.20              | 99.80        |
| 23G214-5G-287_S24 | MH893760.2     | 150,751.00        | 1.00            | 0.00                | 0.01             | 0.20               | 331.00               | 0.30              | 99.70        |
| 23G214-5G-288_S25 | AF409137.1     | 150,793.00        | 4.00            | 13.00               | 3.00             | 1.50               | 961.00               | 0.20              | 99.80        |
| 23G214-5G-289_S26 | MN072619.1     | 150,329.00        | 2.00            | 5.00                | 0.35             | 1.10               | 961.00               | 0.00              | 100.00       |
| 23G214-5G-290_S27 | KX894508.1     | 150,562.00        | 2.00            | 2.00                | 0.02             | 0.60               | 348.00               | 0.00              | 100.00       |
| 23G214-5G-291_S28 | MN995838.1     | 150,721.00        | 2.00            | 2.00                | 0.50             | 0.90               | 772.00               | 0.00              | 100.00       |
| 23G214-5G-292_S29 | KX683219.1     | 150,663.00        | 1.00            | 1.00                | 0.02             | 0.50               | 644.00               | 0.20              | 99.80        |
| 23G214-5G-294_S31 | AF409137.1     | 150,793.00        | 4.00            | 14.00               | 3.00             | 1.50               | 961.00               | 0.20              | 99.80        |
| <b>Mean</b>       |                | <b>150,305.08</b> | <b>2.00</b>     | <b>3.75</b>         | <b>0.61</b>      | <b>0.88</b>        | <b>746.75</b>        | <b>0.19</b>       | <b>99.81</b> |
| <b>SD</b>         |                | <b>1,312.33</b>   | <b>1.04</b>     | <b>4.77</b>         | <b>1.12</b>      | <b>0.40</b>        | <b>231.72</b>        | <b>0.18</b>       | <b>0.18</b>  |

332

333

**Table 1:** Summary of Aligned Contigs, Aligned Loose Reads, Coverage Depth X Coverage Breadth %, and Max Alignment

334

Length of samples containing Lumpy Skin Disease Virus (LSDV) reads.

335

336

337

| S. No. | Sample            | NCBI Acession No. | Name of Accession                                                              | Vaccine Strain (V) / Wild type Strain (WT) | Total Contigs | Contig 1 Position (bp) | Contig 2 Position (bp) | Contig 3 Position (bp) | Contig 4 Position (bp) |
|--------|-------------------|-------------------|--------------------------------------------------------------------------------|--------------------------------------------|---------------|------------------------|------------------------|------------------------|------------------------|
| 1      | 23G214-5G-280_S17 | AF409137.1        | Lumpy skin disease virus NW-LW isolate Neethling Warmbaths LW, complete genome | WT                                         | 1             |                        | 116306-116922          |                        |                        |
| 2      | 23G214-5G-281_S18 | AF325528.1        | Lumpy skin disease virus NI-2490 isolate Neethling 2490, complete genome       | WT                                         | 2             | 57401-57699            | 116138-117098          |                        |                        |
| 3      | 23G214-5G-282_S19 | KY702007.1        | Lumpy skin disease virus isolate SERBIA/Bujanovac/2016, complete genome        | WT                                         | 2             |                        | 115916-116876          |                        | 127172-127893          |
| 4      | 23G214-5G-285_S22 | MT130502.2        | Lumpy skin disease virus strain Neethling-RIBSP vaccine, partial genome        | V                                          | 2             | 55109-55703            |                        |                        | 124934-125655          |
| 5      | 23G214-5G-286_S23 | MN072619.1        | Lumpy skin disease virus isolate Kenya, complete genome                        | WT                                         | 1             |                        | 115916-116876          |                        |                        |
| 6      | 23G214-5G-287_S24 | MH893760.2        | Lumpy skin disease virus strain LSDV/Russia/Dagestan/2015, complete genome     | WT                                         | 1             | 57395-57725            |                        |                        |                        |
| 7      | 23G214-5G-288_S25 | AF409137.1        | Lumpy skin disease virus NW-LW isolate Neethling Warmbaths LW, complete genome | WT                                         | 4             | 57403-57997            | 116144-116475          | 116634-117104          | 127240-127961          |
| 8      | 23G214-5G-289_S26 | MN072619.1        | Lumpy skin disease virus isolate Kenya, complete genome                        | WT                                         | 2             |                        | 115916-116876          |                        | 127007-127728          |
| 9      | 23G214-5G-290_S27 | KX894508.1        | Lumpy skin disease virus isolate 155920/2012, complete genome                  | WT                                         | 2             | 57404-57739            |                        |                        | 127252-127599          |
| 10     | 23G214-5G-291_S28 | MN995838.1        | Lumpy skin disease virus isolate pendik, complete genome                       | WT                                         | 2             | 57361-57955            |                        |                        | 127196-127917          |
| 11     | 23G214-5G-292_S29 | KX683219.1        | Lumpy skin disease virus strain KSGP 0240, complete genome                     | V                                          | 1             |                        | 116256-116896          |                        |                        |
| 12     | 23G214-5G-294_S31 | AF409137.1        | Lumpy skin disease virus NW-LW isolate Neethling Warmbaths LW, complete genome | WT                                         | 4             | 57403-57997            | 116199-116244          | 116144-117104          | 127240-127961          |

338

339 **Table 2:** Details of LSDV Samples: Classification of Vaccine Strain (V) / Wild type Strain (WT), Contig Details, and their Genomic  
340 Position

341

342

| S. No. | sample            | Taxon name (Centrifuge)          | taxID (Centrifuge) | taxRank (Centrifuge) | numReads (Centrifuge) | numUniqueReads (Centrifuge) | Abundance (Centrifuge) | rPM (CZid) |
|--------|-------------------|----------------------------------|--------------------|----------------------|-----------------------|-----------------------------|------------------------|------------|
| 1      | 23G214-5G-280_S17 | Lumpy skin disease virus NI-2490 | 376849             | leaf                 | 154                   | 134                         | 0.000272504            | 17.1864    |
| 2      | 23G214-5G-281_S18 | Lumpy skin disease virus NI-2490 | 376849             | leaf                 | 538                   | 508                         | 0.049054               | 10.5188    |
| 3      | 23G214-5G-282_S19 | Lumpy skin disease virus NI-2490 | 376849             | leaf                 | 1096                  | 963                         | 0.0503631              | 336.258    |
| 4      | 23G214-5G-285_S22 | Lumpy skin disease virus NI-2490 | 376849             | leaf                 | 185                   | 166                         | 0.00782118             | 52.9468    |
| 5      | 23G214-5G-286_S23 | Lumpy skin disease virus NI-2490 | 376849             | leaf                 | 376                   | 319                         | 0.0106748              | 70.5397    |
| 6      | 23G214-5G-287_S24 | Lumpy skin disease virus NI-2490 | 376849             | leaf                 | 279                   | 238                         | 0.00439487             | 19.1551    |
| 7      | 23G214-5G-288_S25 | Lumpy skin disease virus NI-2490 | 376849             | leaf                 | 1083                  | 956                         | 0.195623               | 342.871    |
| 8      | 23G214-5G-289_S26 | Lumpy skin disease virus NI-2490 | 376849             | leaf                 | 751                   | 683                         | 0.0185272              | 160.216    |
| 9      | 23G214-5G-290_S27 | Lumpy skin disease virus NI-2490 | 376849             | leaf                 | 49                    | 39                          | 0.0120165              | 14.2801    |
| 10     | 23G214-5G-291_S28 | Lumpy skin disease virus NI-2490 | 376849             | leaf                 | 1024                  | 903                         | 0.0321114              | 329.775    |
| 11     | 23G214-5G-292_S29 | Lumpy skin disease virus NI-2490 | 376849             | leaf                 | 159                   | 141                         | 0.000831785            | 15.5906    |
| 12     | 23G214-5G-294_S31 | Lumpy skin disease virus NI-2490 | 376849             | leaf                 | 5956                  | 5332                        | 0.0544535              | 1440.89    |

343

344 **Table 3:** Summary of Taxon names, taxon IDs, taxonomic ranks, number of reads, number of unique reads, abundance, and  
345 relative abundance (reads per million) of samples with LSDV reads as determined by Centrifuge and CZid.

346

347 **References**

- 348 1. Chihota, C. M., Rennie, L. F., Kitching, R. P., & Mellor, P. S. (2001). Mechanical  
349 transmission of lumpy skin disease virus by *Aedes aegypti* (Diptera: Culicidae).  
350 *Epidemiology and Infection*, 126(2), 317-321.  
351 <https://doi.org/10.1017/s0950268801005179>
- 352 2. Haegeman, A., Sohier, C., Mostin, L., De Leeuw, I., Van Campe, W., Philips, W., De  
353 Regge, N., & De Clercq, K. (2023). Evidence of Lumpy Skin Disease Virus Transmission  
354 from Subclinically Infected Cattle by *Stomoxys calcitrans*. *Viruses*, 15(6), 1285.  
355 <https://doi.org/10.3390/v15061285>
- 356 3. Sohier, C., Haegeman, A., Mostin, L., De Leeuw, I., Campe, W. V., De Vleeschauer,  
357 A., Tuppurainen, E. S., De Regge, N., & De Clercq, K. (2019). Experimental evidence of  
358 mechanical lumpy skin disease virus transmission by *Stomoxys calcitrans* biting flies and  
359 *Haematopota* spp. Horseflies. *Scientific Reports*, 9(1), 1-10.  
360 <https://doi.org/10.1038/s41598-019-56605-6>
- 361 4. Gupta, T. D., Patial, V., Bali, D., Angaria, S., Sharma, M., & Chahota, R. (2020). A  
362 review: Lumpy skin disease and its emergence in India. *Veterinary Research*  
363 *Communications*, 44(3–4), 111–118. <https://doi.org/10.1007/s11259-020-09780-1>
- 364 5. Lubinga, J. C., Clift, S. J., Tuppurainen, E., Stoltz, W. H., Babiuk, S., Coetzer, J. A., &  
365 Venter, E. H. (2014). Demonstration of lumpy skin disease virus infection in *Amblyomma*  
366 *hebraeum* and *Rhipicephalus appendiculatus* ticks using immunohistochemistry. *Ticks*  
367 *and Tick-borne Diseases*, 5(2), 113–120. <https://doi.org/10.1016/j.ttbdis.2013.09.010>
- 368 6. Tuppurainen, E., Alexandrov, T. & Beltrán-Alcruado, D. 2017. Lumpy skin disease field  
369 manual – A manual for veterinarians. FAO Animal Production and Health Manual No. 20.  
370 Rome. Food and Agriculture Organization of the United Nations (FAO). 60 pages
- 371 7. Aleksandr, K., Olga, B., David, W. B., Pavel, P., Yana, P., Svetlana, K., Alexander, N.,  
372 Vladimir, R., Dmitriy, L., & Alexander, S. (2020). Non-vector-borne transmission of lumpy  
373 skin disease virus. *Scientific Reports*, 10(1), 1-12. [https://doi.org/10.1038/s41598-020-](https://doi.org/10.1038/s41598-020-64029-w)  
374 [64029-w](https://doi.org/10.1038/s41598-020-64029-w)
- 375 8. Shumilova, I., Nesterov, A., Byadovskaya, O., Prutnikov, P., Wallace, D. B., Mokeeva,  
376 M., Pronin, V., Kononov, A., Chvala, I., & Sprygin, A. (2022). A Recombinant Vaccine-  
377 like Strain of Lumpy Skin Disease Virus Causes Low-Level Infection of Cattle through  
378 Virus-Inoculated Feed. *Pathogens*, 11(8). <https://doi.org/10.3390/pathogens11080920>

- 379 9. QIASeq FX DNA Library Kit. (2023). Qiagen.com. [https://www.qiagen.com/zh-](https://www.qiagen.com/zh-us/products/discovery-and-translational-research/next-generation-sequencing/metagenomics/qiaseq-fx-dna-library-kit)  
380 [us/products/discovery-and-translational-research/next-generation-](https://www.qiagen.com/zh-us/products/discovery-and-translational-research/next-generation-sequencing/metagenomics/qiaseq-fx-dna-library-kit)  
381 [sequencing/metagenomics/qiaseq-fx-dna-library-kit](https://www.qiagen.com/zh-us/products/discovery-and-translational-research/next-generation-sequencing/metagenomics/qiaseq-fx-dna-library-kit)
- 382 10. Simmonds, S. E., Ly, L., Beaulaurier, J., Lim, R. G., Morse, T., Thakku, S. G., Rosario,  
383 K., Perez, J. C. R., Puschnik, A. S., Mwakibete, L., Hickey, S. E., Tato, C. M., Team, C.  
384 I., & Kalantar, K. (2024). CZ ID: a cloud-based, no-code platform enabling advanced  
385 long read metagenomic analysis. bioRxiv (Cold Spring Harbor Laboratory).  
386 <https://doi.org/10.1101/2024.02.29.579666>
- 387 11. Langmead, B., & Salzberg, S. L. (2012). Fast gapped-read alignment with Bowtie 2.  
388 Nature Methods, 9(4), 357–359. <https://doi.org/10.1038/nmeth.1923>
- 389 12. Li, H. (2018). Minimap2: Pairwise alignment for nucleotide sequences. Bioinformatics,  
390 34(18), 3094-3100. <https://doi.org/10.1093/bioinformatics/bty191>
- 391 13. Buchfink, B., Xie, C., & Huson, D. H. (2014). Fast and sensitive protein alignment using  
392 DIAMOND. Nature Methods, 12(1), 59-60. <https://doi.org/10.1038/nmeth.3176>
- 393 14. Bankevich, A., Nurk, S., Antipov, D., Gurevich, A. A., Dvorkin, M., Kulikov, A. S., Lesin,  
394 V. M., Nikolenko, S. I., Pham, S., Pribelski, A. D., Pyshkin, A. V., Sirotkin, A. V., Vyahhi,  
395 N., Tesler, G., Alekseyev, M. A., & Pevzner, P. A. (2012). SPAdes: A New Genome  
396 Assembly Algorithm and Its Applications to Single-Cell Sequencing. Journal of  
397 Computational Biology, 19(5), 455-477. <https://doi.org/10.1089/cmb.2012.0021>
- 398 15. Grundy, B., Parikh, H. I., Jacob, S. T., Banura, P., Moore, C. C., Liu, J., & Houpt, E. R.  
399 (2023). Pathogen Detection Using Metagenomic Next-Generation Sequencing of Plasma  
400 Samples from Patients with Sepsis in Uganda. Microbiology Spectrum, 11(1).  
401 <https://doi.org/10.1128/spectrum.04312-22>
- 402 16. Sample QC. (2024). CZ ID Help Center. [https://chanzuckerberg.zendesk.com/hc/en-](https://chanzuckerberg.zendesk.com/hc/en-us/articles/360053758913-Sample-QC#Passed-QC)  
403 [us/articles/360053758913-Sample-QC#Passed-QC](https://chanzuckerberg.zendesk.com/hc/en-us/articles/360053758913-Sample-QC#Passed-QC)
- 404 17. Assemble Viral Consensus Genomes from Sample Report. (n.d.). CZ ID Help Center.  
405 [https://chanzuckerberg.zendesk.com/hc/en-us/articles/13618630200084-Assemble-](https://chanzuckerberg.zendesk.com/hc/en-us/articles/13618630200084-Assemble-Viral-Consensus-Genomes-from-Sample-Report)  
406 [Viral-Consensus-Genomes-from-Sample-Report](https://chanzuckerberg.zendesk.com/hc/en-us/articles/13618630200084-Assemble-Viral-Consensus-Genomes-from-Sample-Report)
- 407 18. Why a pairwise distance matrix instead of a tree? (2024). CZ ID Help Center.  
408 [https://chanzuckerberg.zendesk.com/hc/en-us/articles/13725914751380-Why-a-](https://chanzuckerberg.zendesk.com/hc/en-us/articles/13725914751380-Why-a-Pairwise-Distance-Matrix-Instead-of-a-Tree)  
409 [Pairwise-Distance-Matrix-Instead-of-a-Tree](https://chanzuckerberg.zendesk.com/hc/en-us/articles/13725914751380-Why-a-Pairwise-Distance-Matrix-Instead-of-a-Tree)
- 410 19. Simonrharris. (2024). ska distance. GitHub.  
411 <https://github.com/simonrharris/SKA/wiki/ska-distance#distancetxt-output-columns>



- 412 20. Flannery, J., Shih, B., Haga, I. R., Ashby, M., Corla, A., King, S., Freimanis, G., Polo, N.,  
413 Tse, A. C., Brackman, C. J., Chan, J. Y., Pun, P. H., Ferguson, A. D., Law, A., Lycett, S.,  
414 Batten, C., & Beard, P. M. (2021). A novel strain of lumpy skin disease virus causes  
415 clinical disease in cattle in Hong Kong. *Transboundary and Emerging Diseases*, 69(4).  
416 <https://doi.org/10.1111/tbed.14304>
- 417 21. Wu, T. D., & Nacu, Ş. (2010). Fast and SNP-tolerant detection of complex variants and  
418 splicing in short reads. *Bioinformatics*, 26(7), 873–881.  
419 <https://doi.org/10.1093/bioinformatics/btq057>
- 420 22. Kim, D., Song, L., Breitwieser, F. P., & Salzberg, S. L. (2016). Centrifuge: rapid and  
421 sensitive classification of metagenomic sequences. *Genome Research*, 26(12), 1721–  
422 1729. <https://doi.org/10.1101/gr.210641.116>
- 423 23. Quick, J., Grubaugh, N. D., Pullan, S. T., Claro, I. M., Smith, A. D., Gangavarapu, K.,  
424 Oliveira, G., Robles-Sikisaka, R., Rogers, T. F., Beutler, N., Burton, D. R., Lewis-  
425 Ximenez, L. L., De Jesus, J. G., Giovanetti, M., Hill, S. C., Black, A., Bedford, T., Carroll,  
426 M. W., Nunes, M. R. T., . . . Loman, N. J. (2017). Multiplex PCR method for MinION and  
427 Illumina sequencing of Zika and other virus genomes directly from clinical samples.  
428 *Nature Protocols*, 12(6), 1261–1276. <https://doi.org/10.1038/nprot.2017.066>
- 429 24. Shi, Y., Wang, G., Lau, H. C., & Yu, J. (2022). Metagenomic sequencing for microbial  
430 DNA in human samples: Emerging technological advances. *International Journal of*  
431 *Molecular Sciences*, 23(4), 2181. <https://doi.org/10.3390/ijms23042181>
- 432 25. Jervis-Bardy, J., Leong, L. E. X., Marri, S., Smith, R. J., Choo, J. M., Smith-Vaughan,  
433 H., Nosworthy, E., Morris, P. S., O'Leary, S., Rogers, G. B., & Marsh, R. L. (2015).  
434 Deriving accurate microbiota profiles from human samples with low bacterial content  
435 through post-sequencing processing of Illumina MiSeq data. *Microbiome*, 3(1).  
436 <https://doi.org/10.1186/s40168-015-0083-8>
- 437 26. Ferretti, P., Farina, S., Cristofolini, M., Girolomoni, G., Tett, A., & Segata, N. (2017).  
438 Experimental metagenomics and ribosomal profiling of the human skin microbiome.  
439 *Experimental Dermatology*, 26(3), 211-219. <https://doi.org/10.1111/exd.13210>
- 440 27. García-López, R., Vázquez-Castellanos, J. F., & Moyá, A. (2015). Fragmentation and  
441 coverage variation in viral metagenome assemblies, and their effect in diversity  
442 calculations. *Frontiers in Bioengineering and Biotechnology*, 3.  
443 <https://doi.org/10.3389/fbioe.2015.00141>
- 444 28. Depledge, D. P., Palser, A. L., Watson, S. J., Lai, I. Y., Gray, E. R., Grant, P., Kanda, R.  
445 K., LeProust, E., Kellam, P., & Breuer, J. (2011). Specific Capture and Whole-Genome

- 446 Sequencing of Viruses from Clinical Samples. *PloS One*, 6(11), e27805.  
447 <https://doi.org/10.1371/journal.pone.0027805>
- 448 29. Simonrharris. (2024). SKA/README.md at master · simonrharris/SKA · GitHub.  
449 <https://github.com/simonrharris/SKA/blob/master/README.md>
- 450 30. Ali, J. (2007). Commentary: Livestock, common property resources and rural  
451 smallholders in India. *International Journal of Agricultural Sustainability*, 5, 265 - 268.  
452 <https://doi.org/10.1080/14735903.2007.9684826>.
- 453 31. Bedeković, T., Šimić, I., Krešić, N., & Lojkić, I. (2018). Detection of lumpy skin  
454 disease virus in skin lesions, blood, nasal swabs and milk following preventive  
455 vaccination. *Transboundary and emerging diseases*, 65(2), 491–496.  
456 <https://doi.org/10.1111/tbed.12730>
- 457 32. Katsoulos, P. D., Chaintoutis, S. C., Dovas, C. I., Polizopoulou, Z. S., Brellou, G.,  
458 Agianniotaki, E. I., Tasioudi, K. E., Chondrokouki, E., Papadopoulos, O., Karatzias, H., &  
459 Boscós, C. (2017). Investigation on the incidence of adverse reactions, viraemia and  
460 haematological changes following field immunization of cattle using a live attenuated  
461 vaccine against lumpy skin disease. *Transboundary and Emerging Diseases*, 65(1),  
462 174–185. <https://doi.org/10.1111/tbed.12646>
- 463 33. Rose, R., Constantinides, B., Tapinos, A., Robertson, D. L., & Prospero, M. (2016).  
464 Challenges in the analysis of viral metagenomes. *Virus Evolution*, 2(2), vew022.  
465 <https://doi.org/10.1093/ve/vew022>

passed\_filters total\_reads

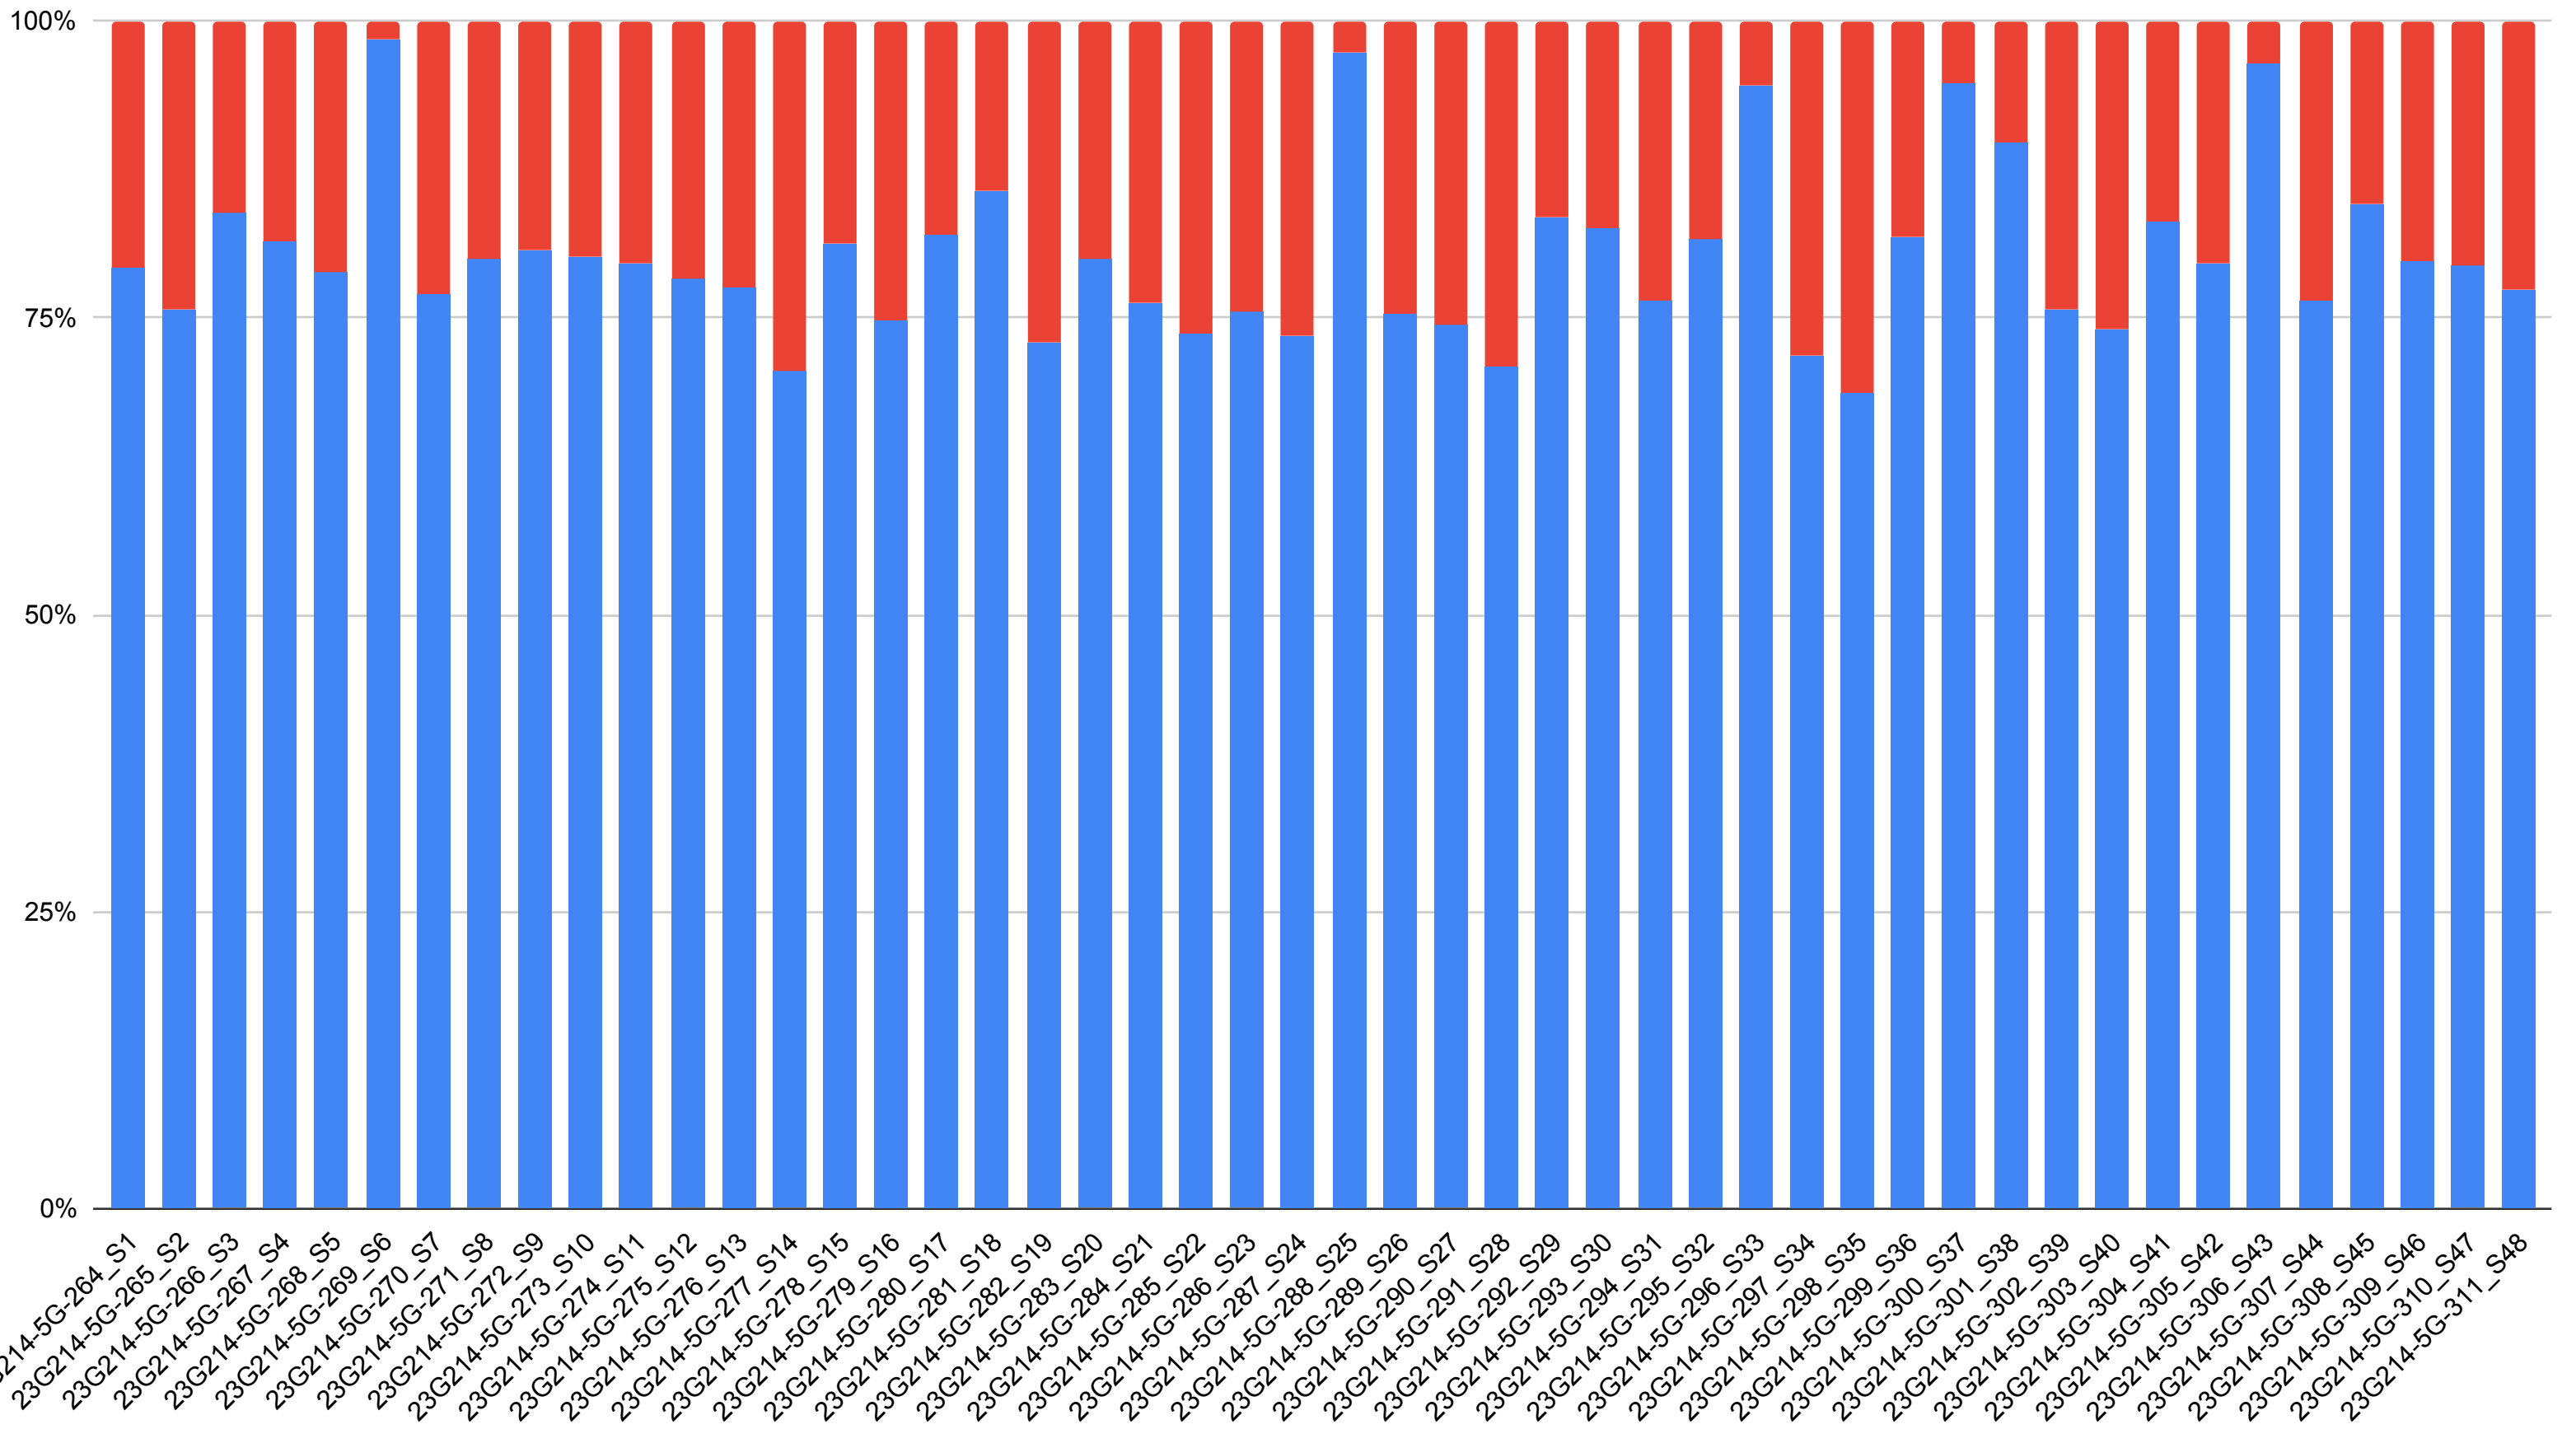

# %\_Reads\_Passing\_QC and %\_Reads\_Failing\_QC

■ %\_Reads\_Failing\_QC ■ %\_Reads\_Passing\_QC

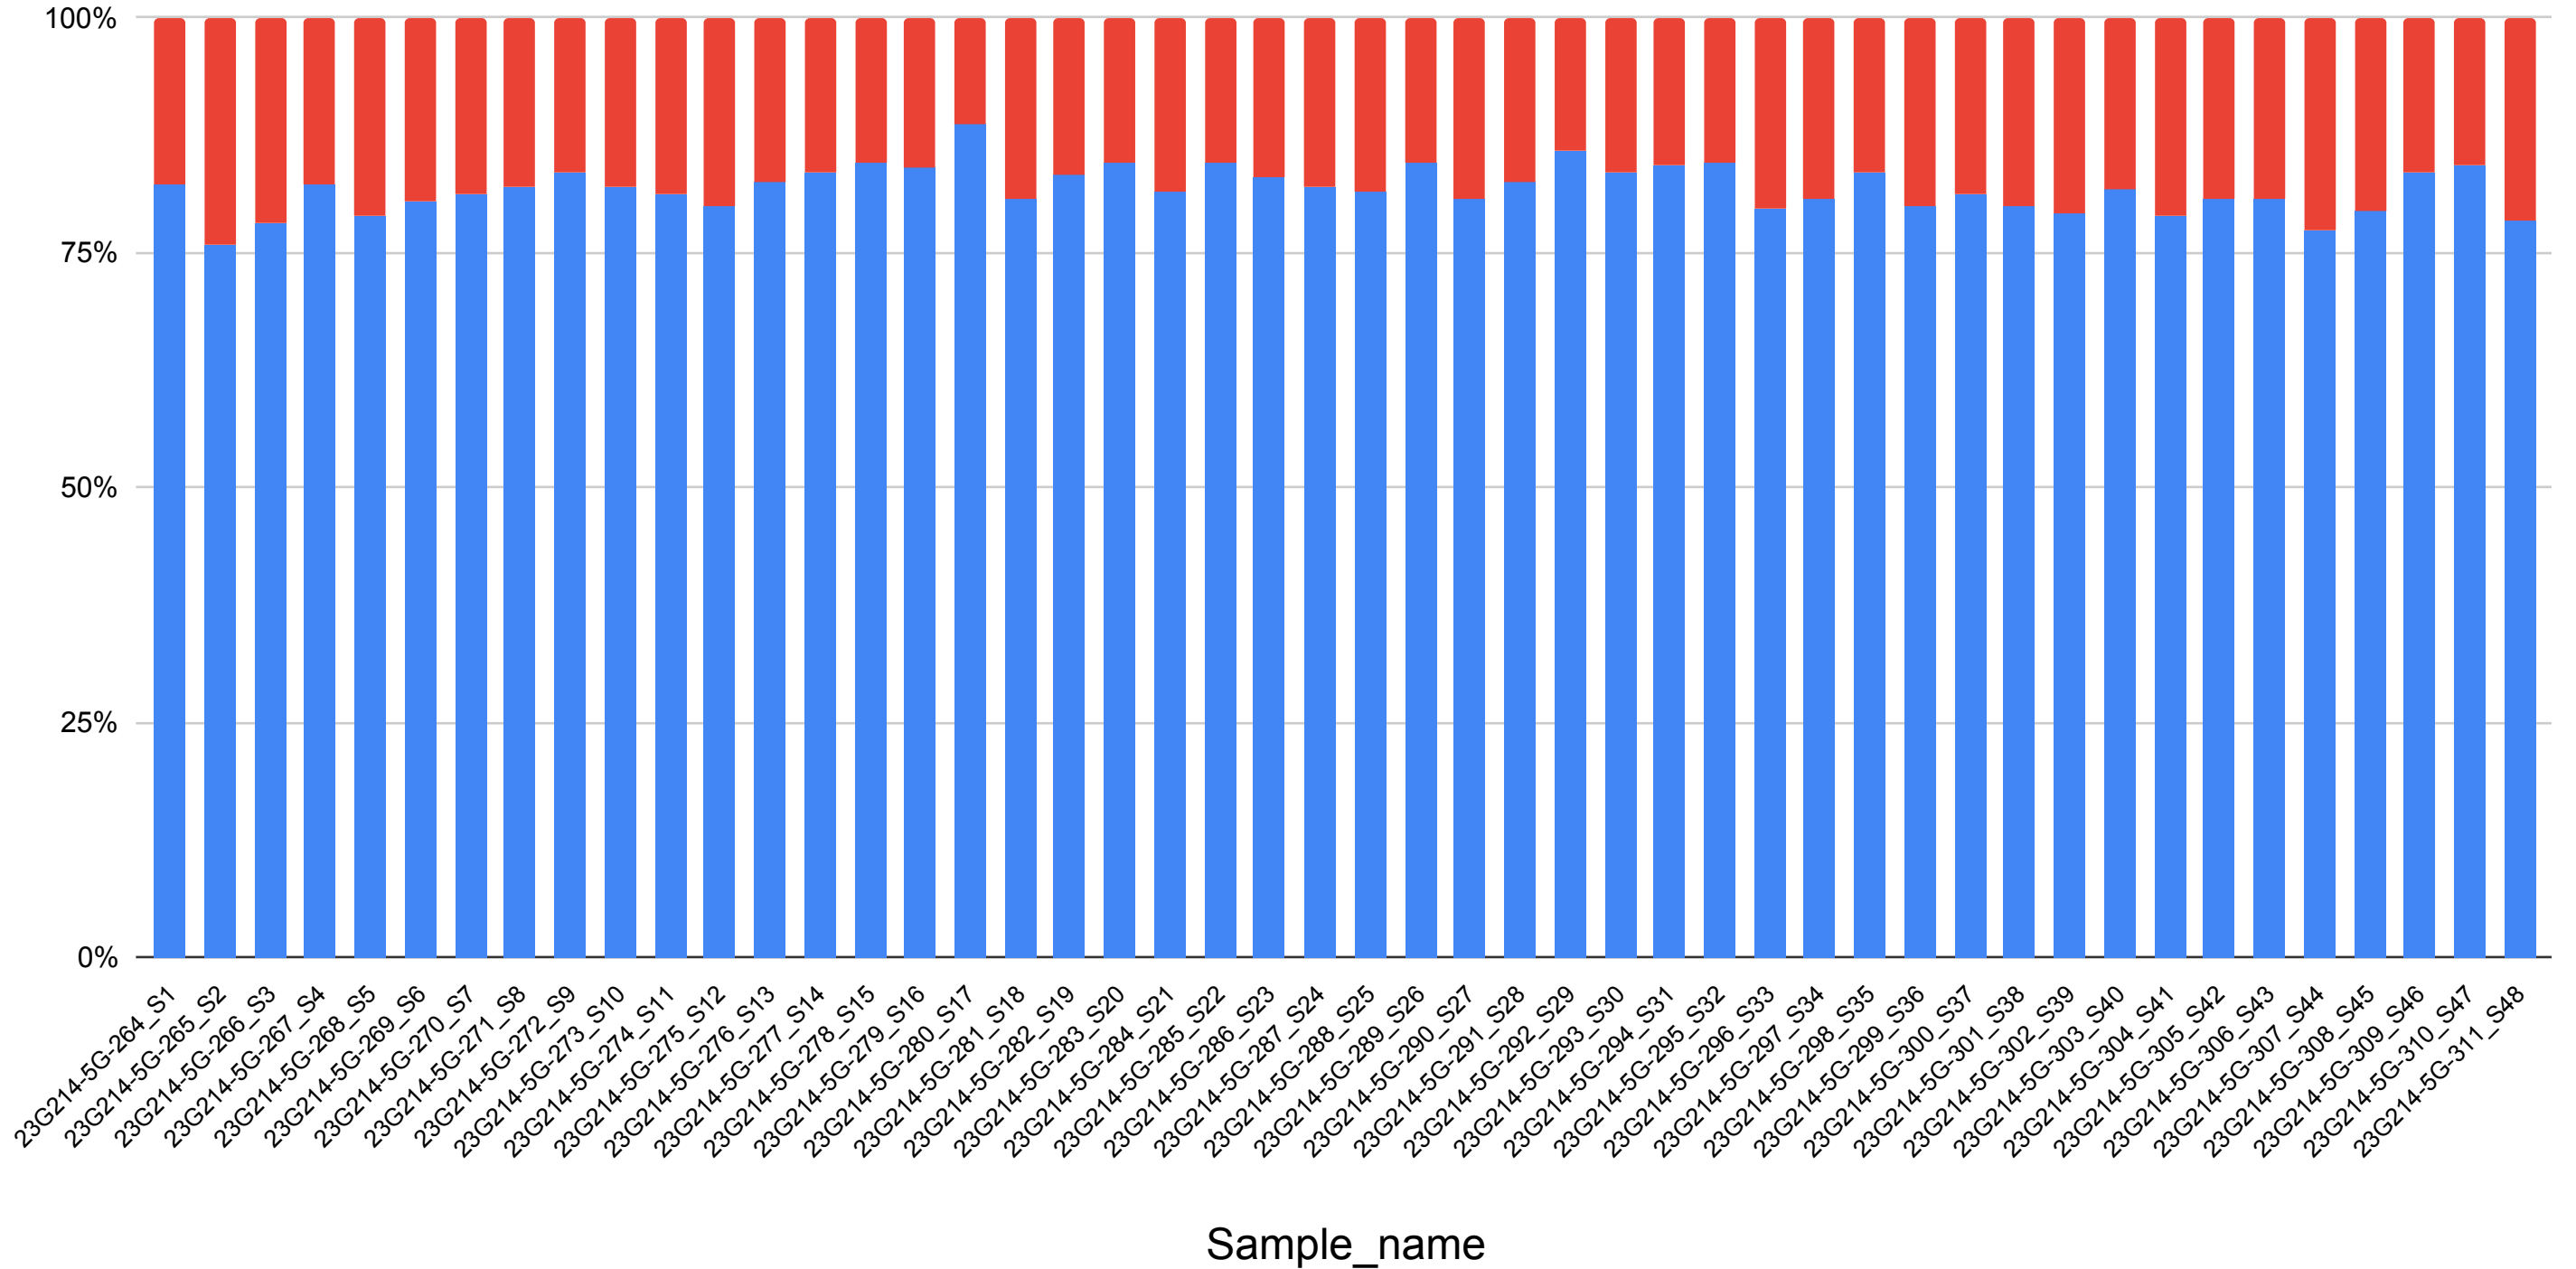



| Taxon                    | Mapped Reads | GC Content | SNPs | %id  | Informative Nucleotides | % Genome Called | Missing Bases | Ambiguous Bases |
|--------------------------|--------------|------------|------|------|-------------------------|-----------------|---------------|-----------------|
| Lumpy skin disease virus | 12441        | 27.7%      | 1    | 100% | 2271                    | 1.5%            | 68280         | 10              |

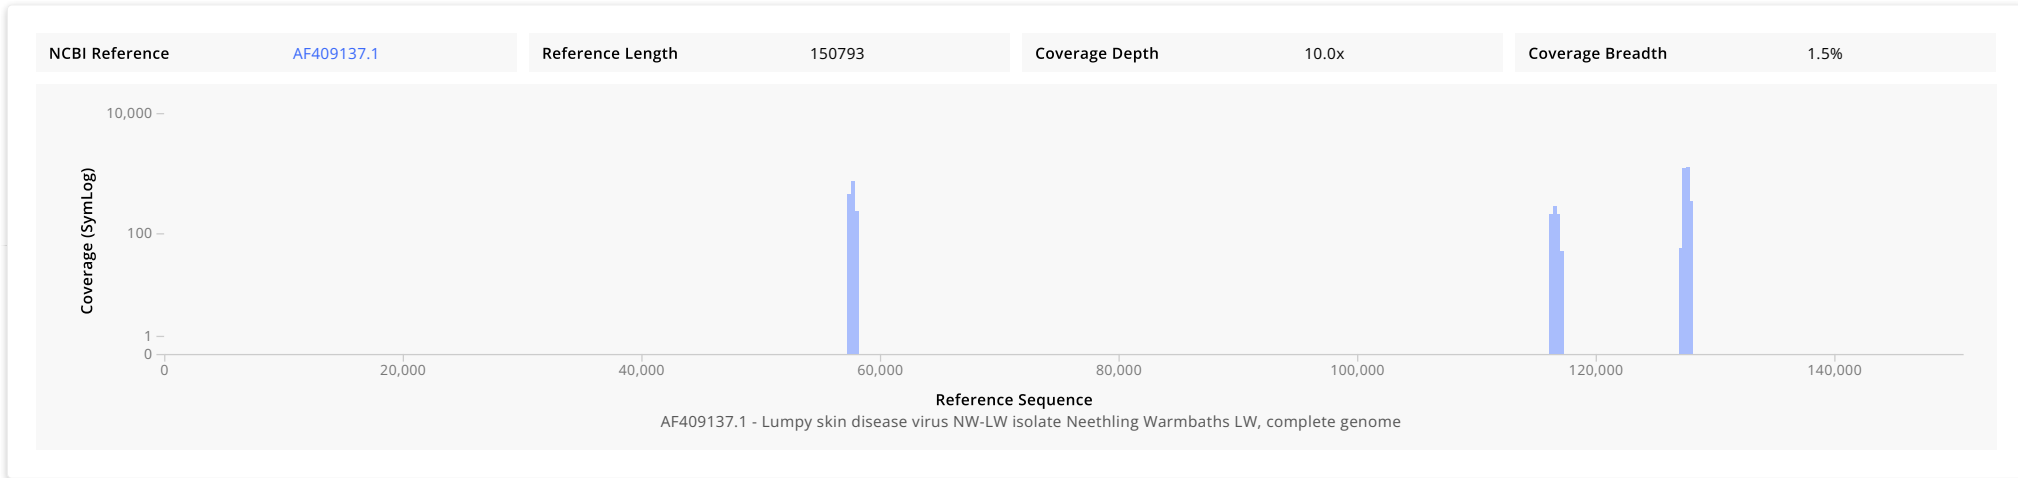





## UniqueReads (Centrifuge) vs. sample

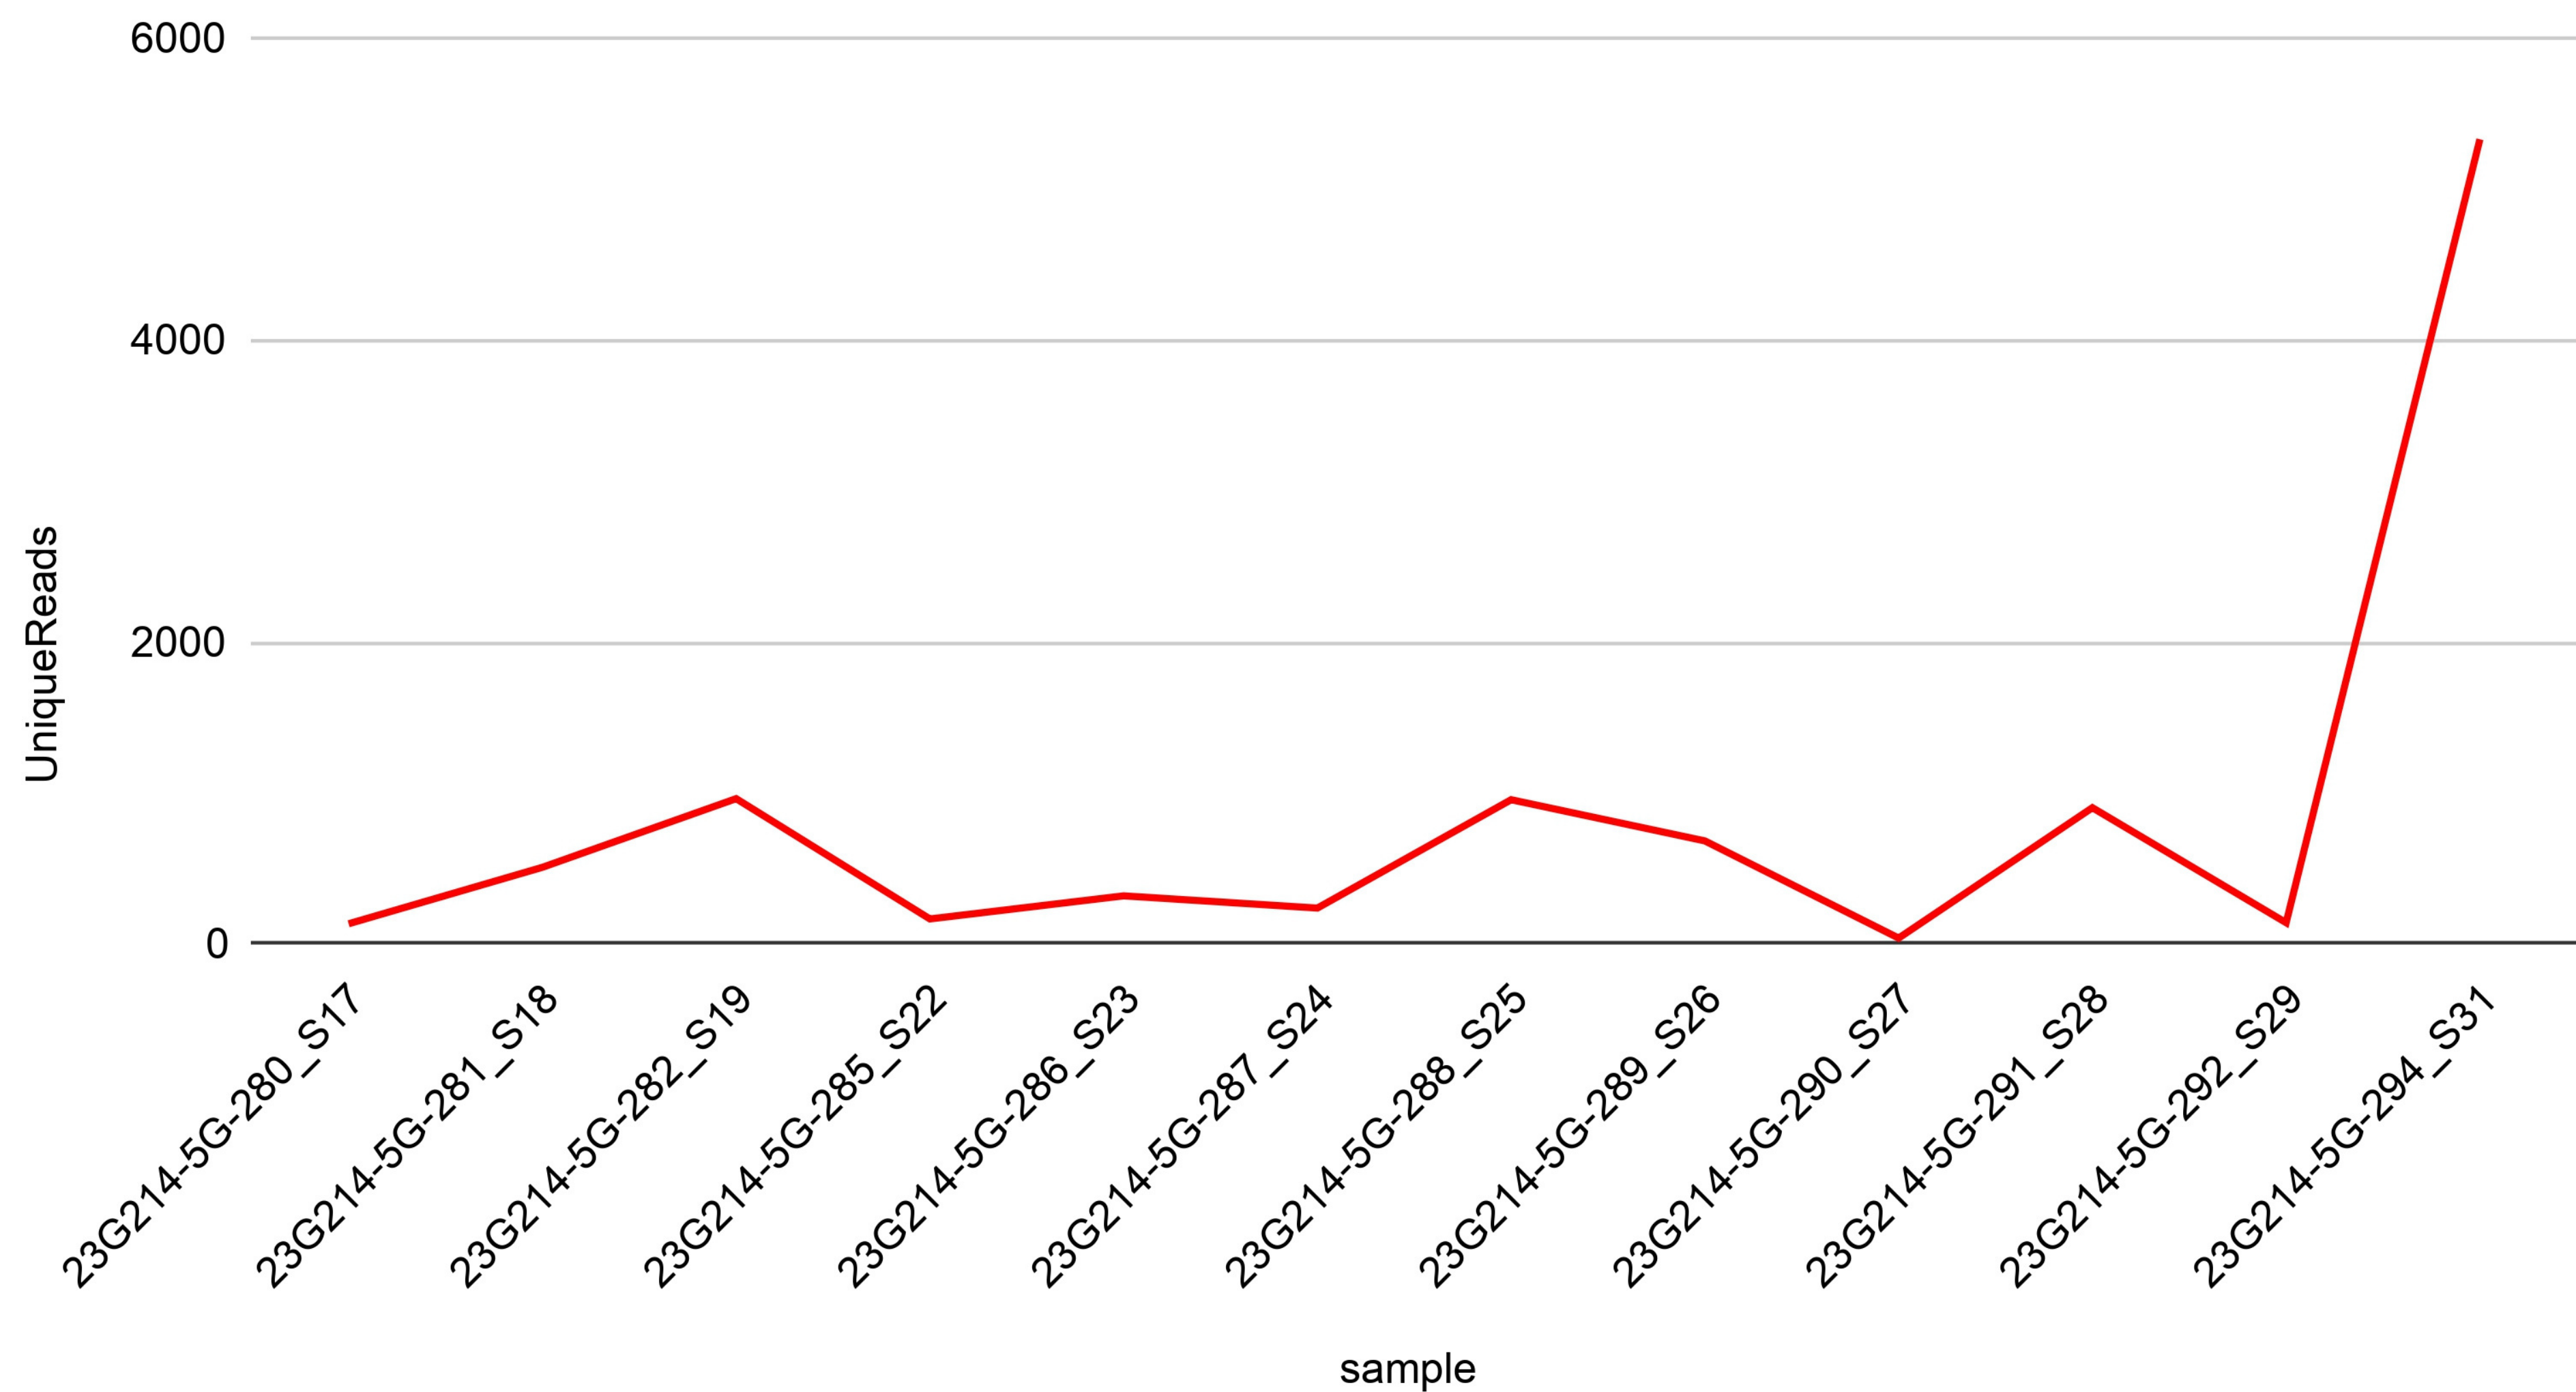

## rPM (Czid) vs. sample

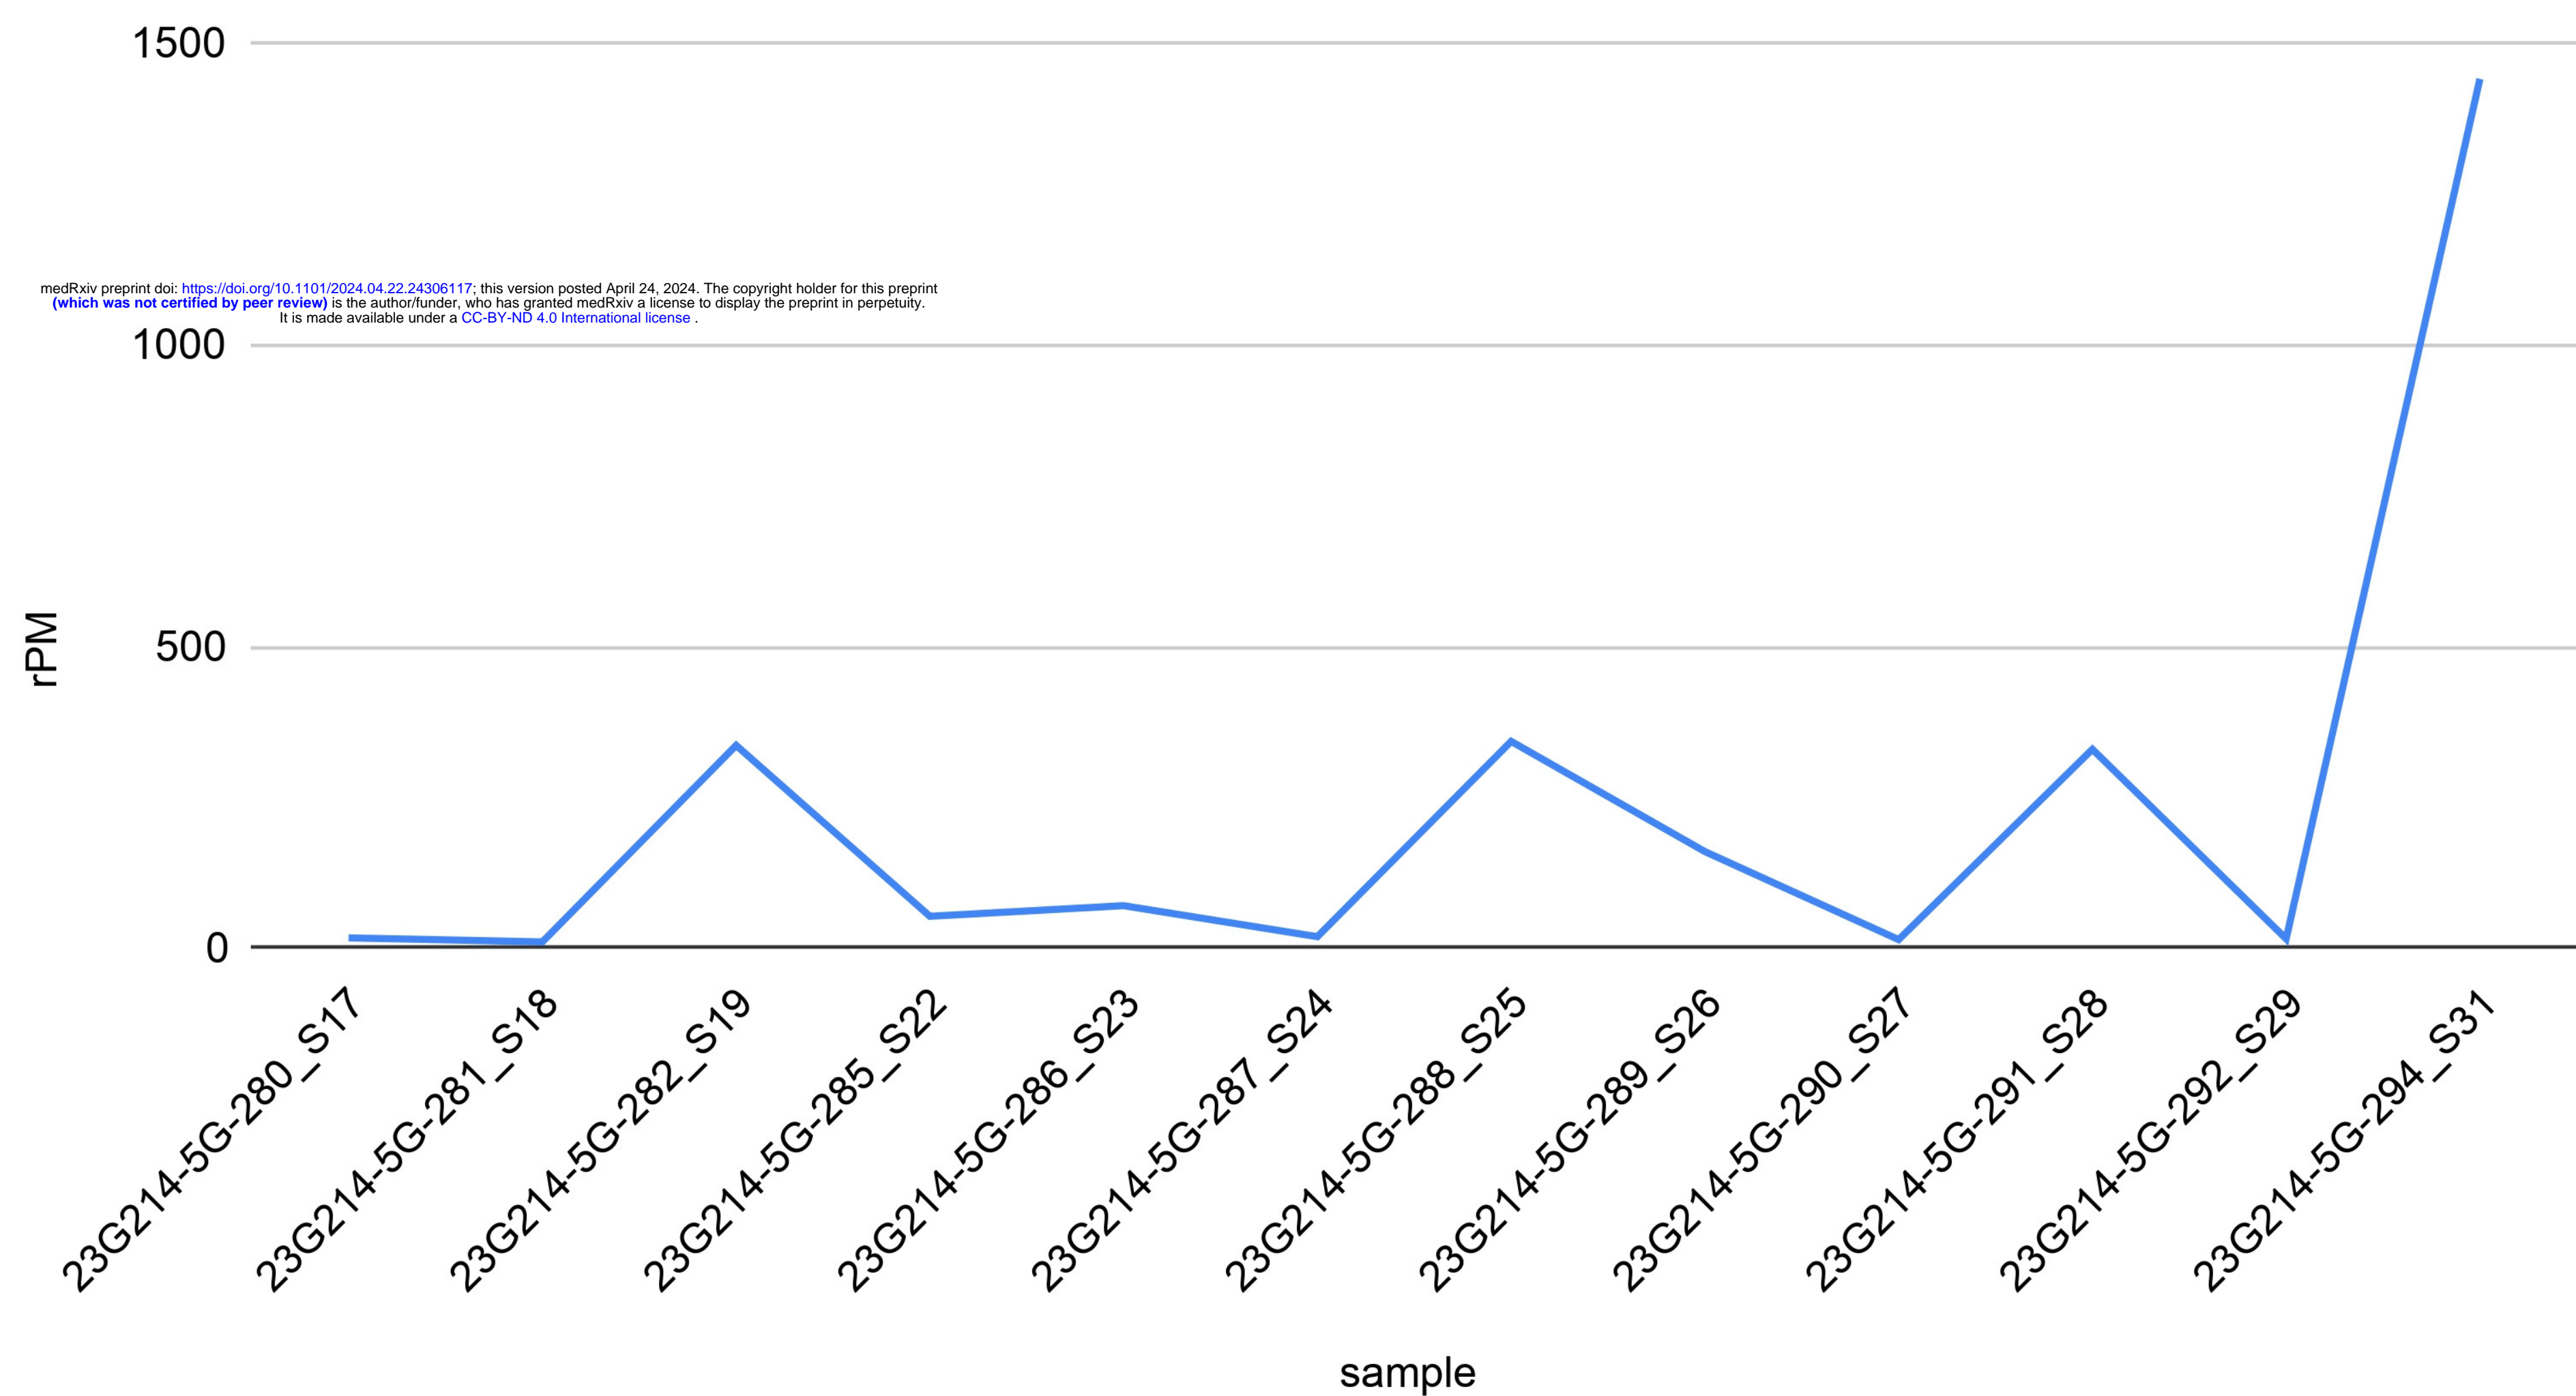

medRxiv preprint doi: <https://doi.org/10.1101/2024.04.22.24308117>; this version posted April 24, 2024. The copyright holder for this preprint (which was not certified by peer review) is the author/funder, who has granted medRxiv a license to display the preprint in perpetuity. It is made available under a [CC-BY-ND 4.0 International license](https://creativecommons.org/licenses/by-nd/4.0/).
